# Supplementary material for: Sex-Specific Effects of Short-Term Oral Administration of Food-Grade Titanium Dioxide Nanoparticles in the Liver and Kidneys of Adult Rats
Source: MDPI journal article supplement (doi:10.3390/toxics11090776), 2023-09-13
Supplement: s1 [file s1]

## Supplementary Material

**Table S1** The primer sequences for analysed genes. NPY: Neuropeptide Y; SPP1: Osteopontin; IL6: interleukin-6; VEGFA: Vascular Endothelial Growth Factor

| Gene  | Primer  | Sequence (5'-3')      |
|-------|---------|-----------------------|
| NPY   | forward | CCCGCCATGATGCTAGGTAA  |
|       | reverse | AGTGTCTCAGGGTGGATCT   |
| SPP1  | forward | CCAGCCAAGGACCAACTACA  |
|       | reverse | AGTGTTTGCTGTAATGCGCC  |
| IL6   | forward | CTCTCCGCAAGAGACTTCCAG |
|       | reverse | TTCTGACAGTGCATCATCGCT |
| VEGFA | forward | CGGTTCCAGAAGGGAGAGGA  |
|       | reverse | ACTTCACCACTTCATGGGCT  |

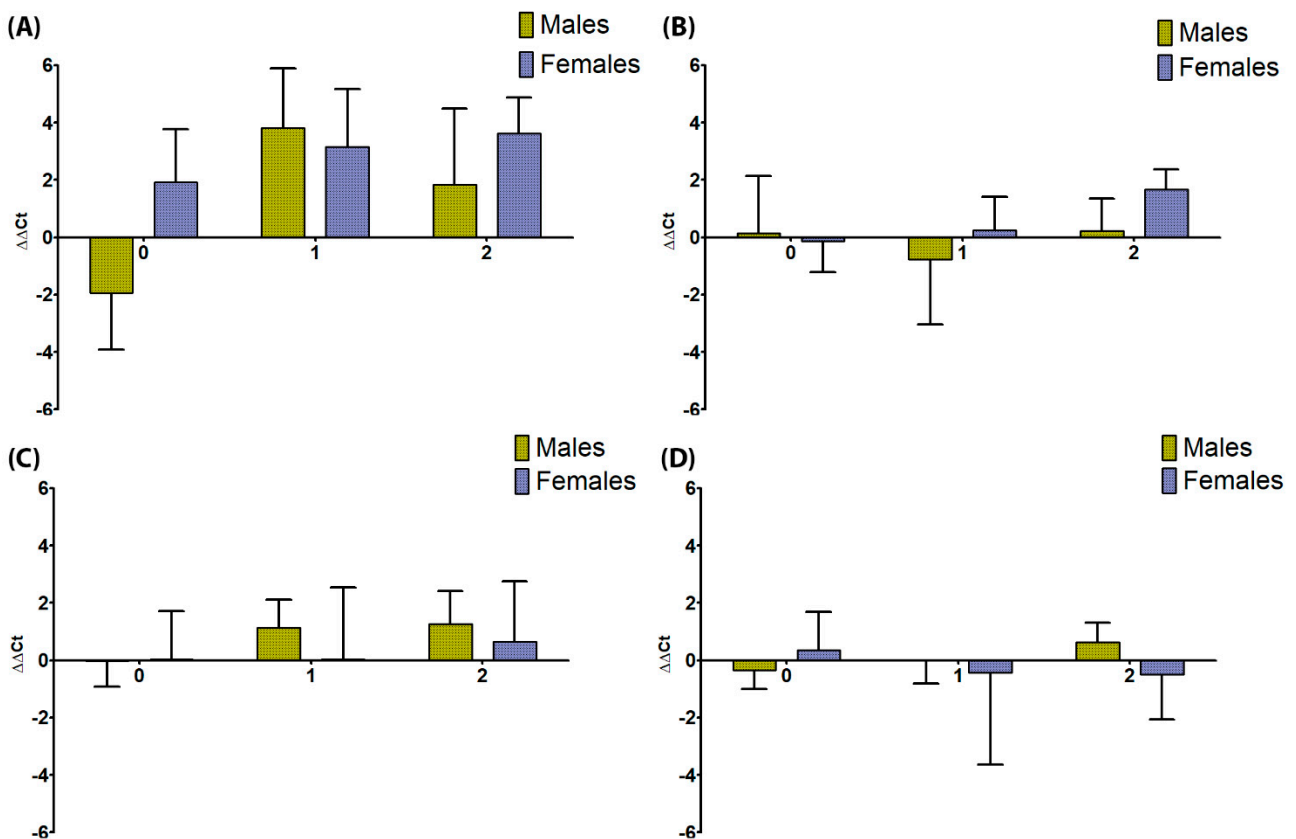

**Figure S1.** Gene expression analysis of kidney NPY (A), SPP1 (B), and IL6 (C) and VEGFA (D) by real-time PCR of male and female rats orally treated for 5 days with 0, 1 and 2 mg/kg bw per day of TiO<sub>2</sub> NP. Data are presented as mean  $\Delta\Delta C_t$  values  $\pm$  standard deviation, with control samples as calibrators and GAPDH as the reference gene. Statistical analysis Mann–Whitney test. n=5.
